# Supplementary material for: Magnitude of Stratification in Human Populations and Impacts on Genome Wide Association Studies
Source: PLoS One. 2010 Jan 13;5(1):e8695. doi: 10.1371/journal.pone.0008695 (PMC2805717; doi:10.1371/journal.pone.0008695)
Supplement: Table S1 — Cis eQTL detected in the African American samples from the human liver-specific cohort. (0.03 MB XLS) [file pone.0008695.s001.xls]

## Sheet: TableS1
Table S1
Reporter ID	SNP ID	KW test p-value
10023814496	rs646776	1.26398e-137
10023827392	rs12711521	3.31552e-23
10023846331	rs646776	3.19179e-137
10025905565	rs4074709	3.55474e-24
10025919799	rs11211152	1.12027e-155
10025935784	rs873308	1.01455e-112
10026392691	rs646776	7.16356e-140
10031920561	rs10494040	7.48122e-76
10023827504	rs10169398	8.01315e-85
10025912748	rs10190397	1.68451e-45
10025928852	rs12713820	4.24426e-99
10023836140	rs2360610	1.15922e-50
10023807966	rs3181191	6.26028e-68
10023814006	rs7734561	5.95367e-107
10023822915	rs4976562	8.09334e-85
10023823031	rs7704674	6.40013e-78
10023841832	rs10044354	2.57598e-143
10025903179	rs2591961	8.05288e-68
10025904458	rs9763161	3.69073e-77
10025926324	rs9313375	6.59434e-64
10023808986	rs9271568	1.50825e-91
10023811102	rs9380167	3.99376e-91
10023813243	rs3117415	9.3053e-141
10023823043	rs13217993	1.67685e-101
10023833711	rs9349693	3.95258e-95
10023846324	rs10498743	3.34412e-55
10025903871	rs7767111	2.39704e-47
10025925970	rs6938061	3.18167e-69
10031919752	rs9271568	3.16673e-95
10023823383	rs13437864	1.6751e-78
10023839831	rs2571997	2.70967e-155
10025910749	rs2571997	3.27795e-156
10023843271	rs8180944	1.39262e-93
10025908411	rs9071	6.18592e-86
10023835104	rs2026991	2.58207e-68
10025904244	rs7073610	2.39603e-49
10025906133	rs3750965	1.89411e-113
10031920631	rs17133461	2.57312e-115
10023820682	rs10843881	8.34306e-125
10025909346	rs10876864	1.75891e-103
10025924165	rs12892792	4.67481e-112
10023833510	rs3910748	1.55718e-64
10023815790	rs9937691	1.1198e-85
10023846175	rs9328722	2.63886e-58
10025907104	rs2279308	1.0325e-89
10025932554	rs1045599	1.33571e-117
10025904547	rs11668758	2.55018e-123
10025934062	rs12984158	1.3448e-86
10031920673	rs10425594	3.93574e-121
10023836456	rs562954	8.23148e-90
10025924060	rs752775	9.31701e-72
10025935510	rs1780634	3.50566e-81
10023828093	rs7282770	1.11695e-120
10023807913	rs6008497	2.9887e-22
10025928261	rs760554	1.5234e-63
